# Supplementary material for: Vocal caricatures reveal signatures of speaker identity
Source: PubMed Central journal article supplement — Sci Rep. 2013 Dec 3;3:3407. doi: 10.1038/srep03407 (PMC3847701; doi:10.1038/srep03407), 2013-12-03
Supplement: srep03407-s1.pdf [file srep03407-s1.pdf]

## **Vocal caricatures reveal signatures of speaker identity**

Sabrina López<sup>1</sup>, Pablo Riera<sup>2</sup>, María Florencia Assaneo<sup>1</sup>, Manuel Eguía<sup>2</sup>, Mariano Sigman<sup>3,4</sup> & Marcos A. Trevisan<sup>1</sup>

<sup>1</sup>Dynamical Systems Lab, IFIBA-Physics dept, University of Buenos Aires, Pabellón 1, Ciudad Universitaria, CABA 1428EGA, Argentina, <sup>2</sup>Acoustics and Sound Perception Lab, Universidad of Quilmes, Roque Sáenz Peña 352, Bernal, Buenos Aires B1876BXD, Argentina, <sup>3</sup>Integrative Neuroscience Lab, IFIBA-Physics dept, University of Buenos Aires, Pabellón 1, Ciudad Universitaria, CABA 1428EGA, Argentina, <sup>4</sup>Torcuato Di Tella University, Almirante Juan Saenz Valiente 1010, C1428BIJ Buenos Aires, Argentina.

## Supplementary Information Summary

Audio files of targets and imitations in wav format.

Audio S1\_T1 contains the target sentence T1.

Audio S2\_I1c1 contains the caricature of T1 from impersonator 1.

Audio S3\_I1r1 contains the replica of T1 from impersonator 1.

Audio S4\_I2c1 contains the caricature of T1 from impersonator 2.

Audio S5\_I2r1 contains the replica of T1 from impersonator 2.

Audio S6\_I3c1 contains the caricature of T1 from impersonator 3.

Audio S7\_I3r1 contains the replica of T1 from impersonator 3.

Audio S8\_I4c1 contains the caricature of T1 from impersonator 4.

Audio S9\_I4r1 contains the replica of T1 from impersonator 4.

Audio S10\_I5c1 contains the caricature of T1 from impersonator 5.

Audio S11\_I5r1 contains the replica of T1 from impersonator 5.

Audio S12\_T2 contains the target sentence T2.

Audio S13\_I1c2 contains the caricature of T2 from impersonator 1.

Audio S14\_I1r2 contains the replica of T2 from impersonator 1.

Audio S15\_I2c2 contains the caricature of T2 from impersonator 2.

Audio S16\_I2r2 contains the replica of T2 from impersonator 2.

Audio S17\_I3c2 contains the caricature of T2 from impersonator 3.

Audio S18\_I3r2 contains the replica of T2 from impersonator 3.

Audio S19\_I4c2 contains the caricature of T2 from impersonator 4.

Audio S20\_I4r2 contains the replica of T2 from impersonator 4.

Audio S21\_I5c2 contains the caricature of T2 from impersonator 5.

Audio S22\_I5r2 contains the replica of T2 from impersonator 5.
